# Supplementary material
Source: PubMed Central journal article supplement (PMC2949008)
Supplement: pp.110.161356_1.pdf [file pp.110.161356_1.pdf]

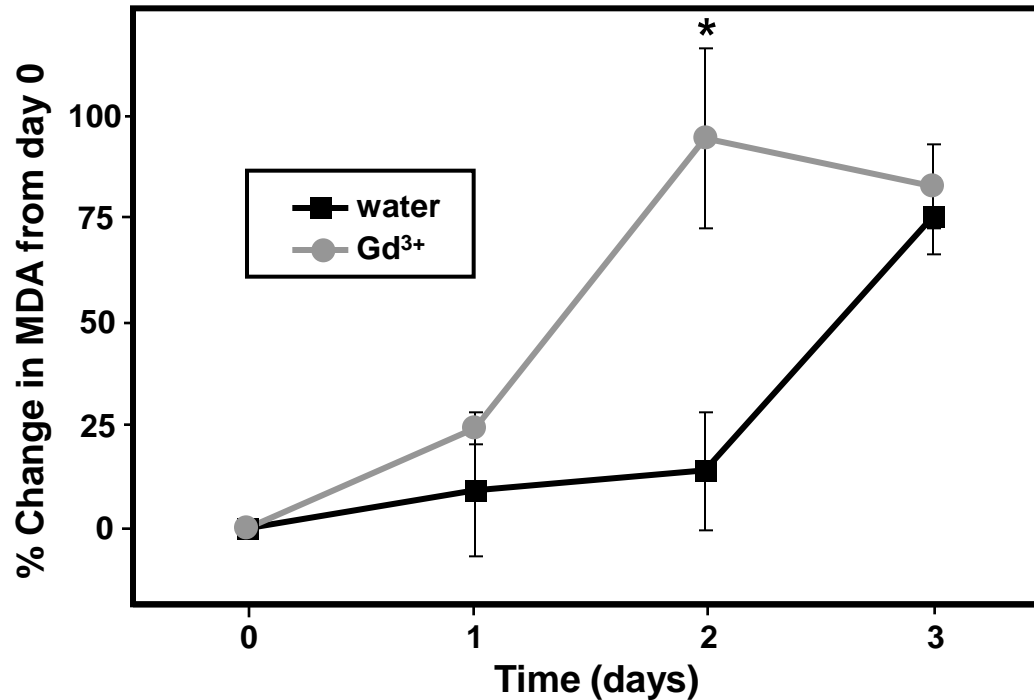

**Supplemental Figure 1.** MDA levels in leaves detached from wild-type plants and floated in the dark on water or 100  $\mu\text{M}$   $\text{Gd}^{3+}$  for 0-3 d. Leaves 3-5 of seedlings were used for this assay. Results are presented as mean percentage change (from day 0) for each genotype ( $n = 3$ )  $\pm$  SE. ANOVA analysis was used to evaluate means separation between WT and *dnd1* at each time point. Significant differences (at  $p < 0.05$ ) are indicated by a '\*' above symbols.

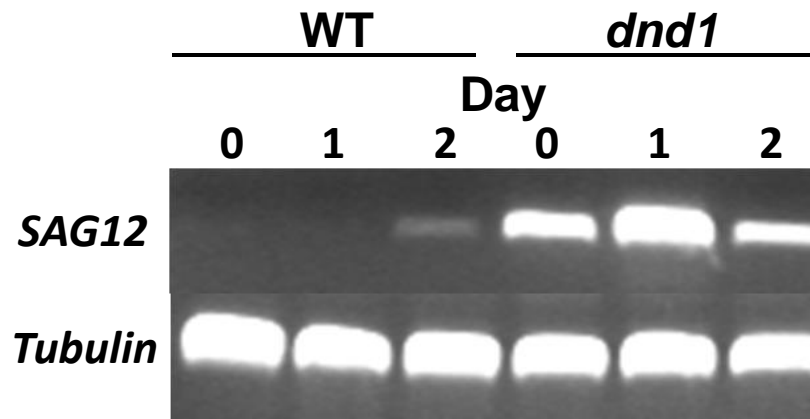

**Supplemental Figure 2.** *SAG12* transcript accumulation in wild-type (WT) and *dnd1* detached leaves (kept in the dark on water for 0-2 d) was analyzed by semi-quantitative RT-PCR. *tubulin* is shown as a loading control. Leaf 5 of seedlings was used for this assay.

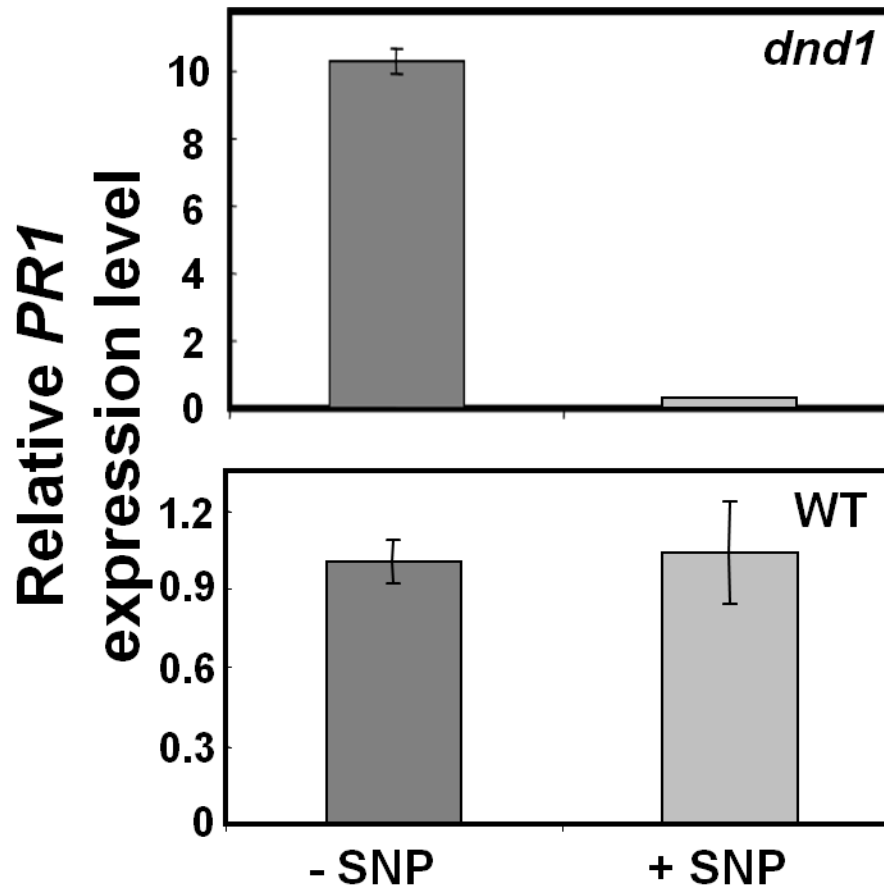

**Supplemental Figure 3.** Quantitative real-time PCR analysis of *PR1* transcript accumulation (relative to *tubulin* transcript) in leaves of *dnd1* and wild-type (WT) plants treated with 0 or 50  $\mu$ M SNP as described in Figure 5D.
